# Supplementary material for: The MCL1-specific inhibitor S63845 acts synergistically with venetoclax/ABT-199 to induce apoptosis in T-cell acute lymphoblastic leukemia cells
Source: PubMed Central journal article supplement (PMC6327051; doi:10.1038/s41375-018-0201-2), 2018-07-15

## Supplementary Figure 2

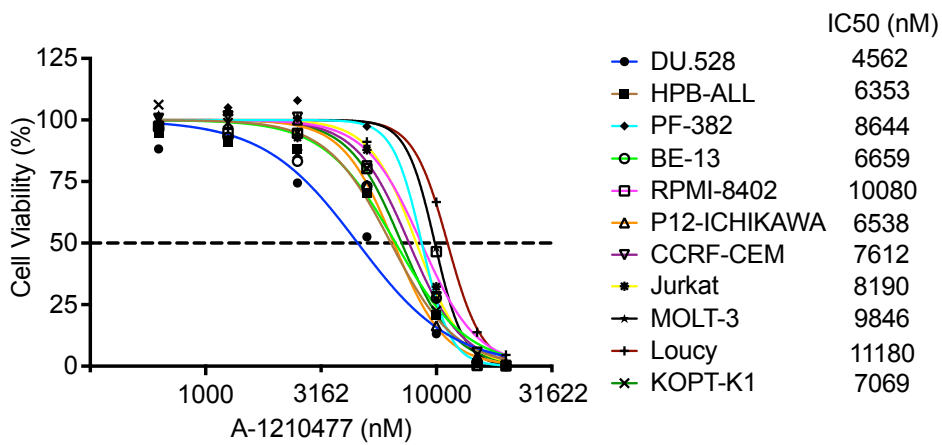

Supplement: 41375_2018_201_MOESM3_ESM.pdf [file 41375_2018_201_MOESM3_ESM.pdf]
